# Supplementary material for: Layer-by-layer assembled ionic-liquid functionalized graphene–polyaniline nanocomposite with enhanced electrochemical sensing properties
Source: Royal Society of Chemistry journal article supplement (doi:10.1039/c4tc00126e), 2014-01-01
Supplement: c4tc00126e1.pdf [file c4tc00126e1.pdf]

## Supporting information

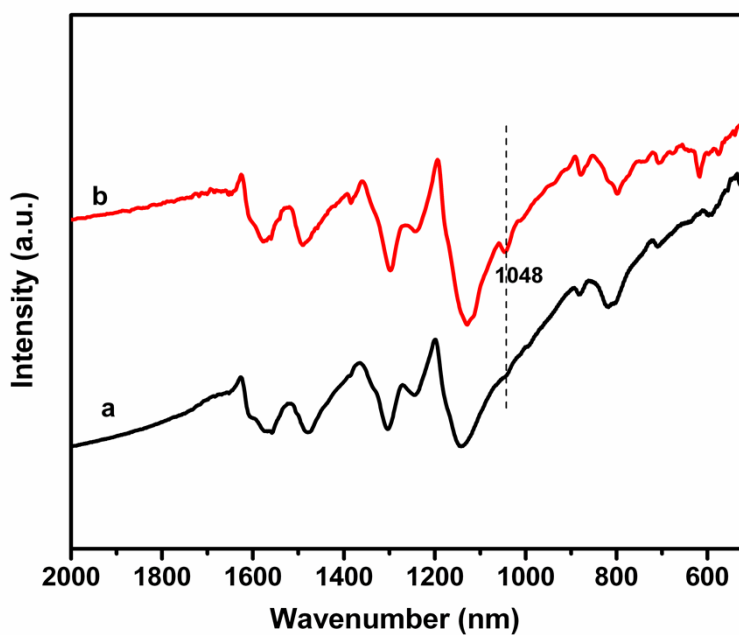

**Fig. S1** FTIR spectra of PANI (a), s-PANI (b).

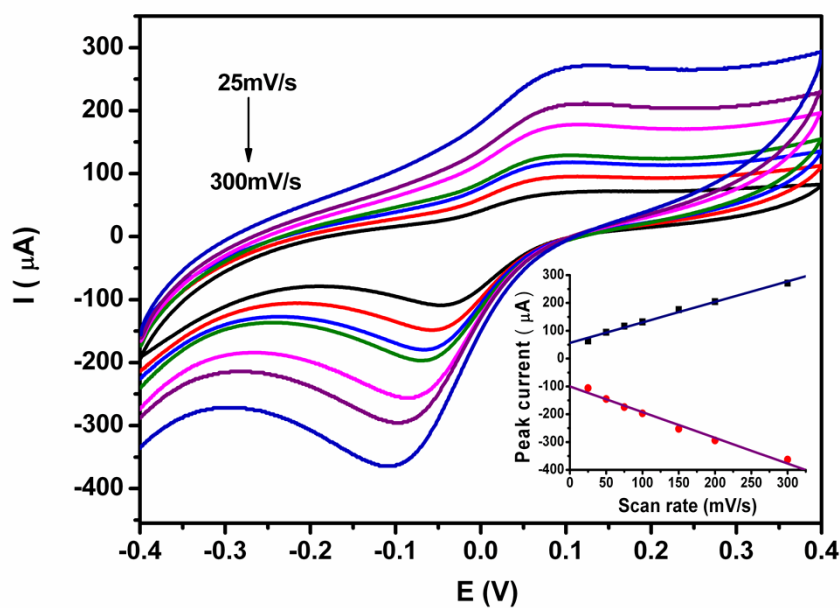

**Fig. S2** Cyclic voltammograms of {IL-GR/s-PANI}<sub>8</sub> multilayer film in PBS buffers

(pH 7.2) with different scan rates.

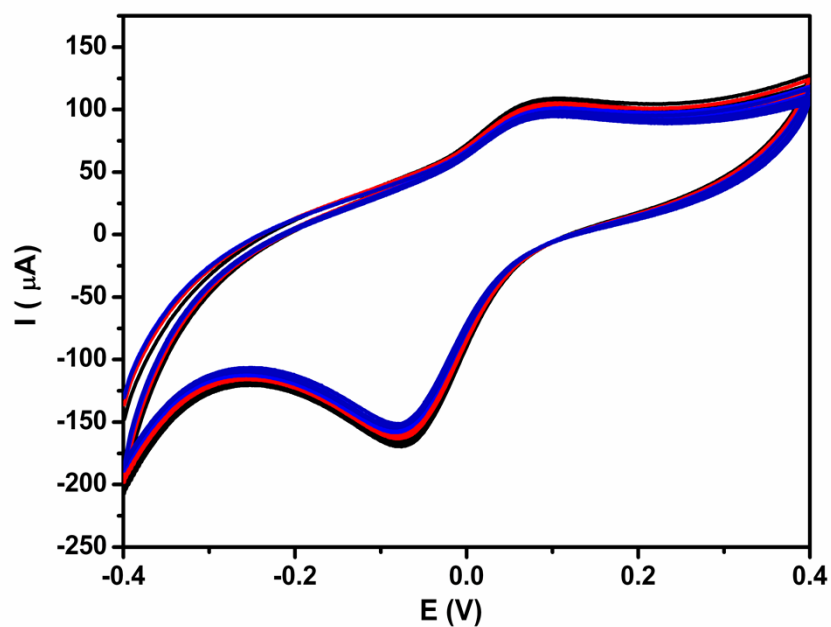

**Fig. S3** Cyclic voltammograms of {IL-GR/s-PANI}<sub>8</sub> modified electrode in 0.1 M PBS buffer solution, pH 7.0 upon repeated cyclic potential scan. Scan rate was 100 mV/s.

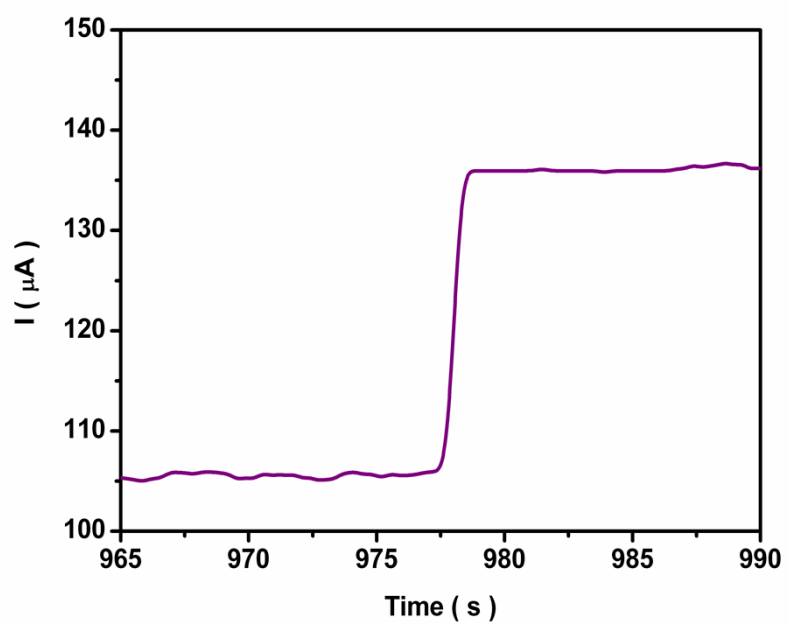

**Fig. S4** The enlargement of one step addition of  $\text{H}_2\text{O}_2$  in Fig. 9(A)
